# Supplementary material for: Universal Virucidal Activity of Calcium Bicarbonate Mesoscopic Crystals That Provides an Effective and Biosafe Disinfectant
Source: MDPI journal article supplement (doi:10.3390/microorganisms10020262), 2022-01-24
Supplement: s1 [file s1]

**Table S1.** Primers used in this study

| Virus               | Target         | Primer                   | Sequence (5' - 3')                                         | Annealing temperature | Amplicon size (bp) | Reference  |
|---------------------|----------------|--------------------------|------------------------------------------------------------|-----------------------|--------------------|------------|
| IBRV                | gB             | BoHV-F<br>BoHV-R         | TGTGGACCTAAACCTCACGGT<br>GTAGTCGAGCAGACCCGTGTC             | 60°C                  | 97                 | 1          |
| PrV                 | gB             | PRV-gB718F<br>PRV-gB812R | ACAAGTTCAAGGCCACATCTAC<br>GTCYGTGAAGCGGTTCTGTAT            | 62 °C                 | 94                 | 2          |
| CHV-1               | gB             | CHV-For<br>CHV-Rev       | ACAGAGTTGATTGATAGAAGAGGTATG<br>CTGGTGTATTAAACTTTGAAGGCTTTA | 60°C                  | 136                | 3          |
| EHV-1               | gB             | FC3<br>R1                | ATACGATCACATCCAATCCC<br>GCGTTATAGCTATCACGTCC               | 60°C                  | 188                | 4          |
| BAdV-7              | DNA polymerase | BAdV-7-F<br>BAdV-7-R     | GCGTTTTGGACAACACTTCA<br>TGGTTCATTGCAACCAAAA                | 52 °C                 | 200                | This study |
| CPV-2               | VP2            | CPV-F<br>CPV-R           | TGGAAGTGTGGCACACCAA<br>AAATGGTGGTAAGCCCAATG                | 56 °C                 | 200                | 5          |
| BPIV-3              | MP             | BPI3F<br>BPI3R           | TGTCTTCCAATAGATAGAGGGATAAAATT<br>GCAATGATAACAATGCCATGGA    | 60°C                  | 111                | 6          |
| BRSV                | NP             | BRSV-F<br>BRSV-R         | GGTCAAATAAATGACACTTTCAACAAG<br>AGCATACCACACAACCTTATTGAGATG | 60°C                  | 137                | 1          |
| CDV                 | NP             | CDV-N-For<br>CDV-N-Rev   | ACCGGAAATCGATGGAAGC<br>GTCCCAGGTTGACTGAGCATCT              | 56 °C                 | 67                 | 7          |
| NDV                 | NP             | Pla-rt13<br>Pla-rt14     | CAACAATAGGAGTGGAGTGTCTGA<br>CAGGGTATCGGTGATGTCTTCT         | 55 °C                 | 145                | 8          |
| VSV                 | L              | VSNJV-F<br>VSNJV-R       | TGATTCAATATAATTATTTTGGGAC<br>AGGCTCAGAGGCATGTTTCAT         | 52 °C                 | 266                | 9          |
| SARS-CoV-2          | N              | nCOV_N_F2<br>nCOV_N_R2   | AAATTTTGGGGACCAGGAAC<br>TGGCAGCTGTGTAGGTCAAC               | 55 °C                 | 158                | 10         |
| BCoV                | N              | BCoV-N-F<br>BCoV-N-R     | TTCTCAGCAACCATCAGGAG<br>ACCCCTTAGCTTCAGTAGCC               | 60 °C                 | 149                | This study |
| SwIV                | M1             | IAV-M1-F<br>IAV-M1.2-R   | AGATGAGTCTTCTAACCGAGGTCG<br>TGCAAAGACACTTCCAGTCTCTG        | 60°C                  | 99                 | 11         |
| EqIV                | NP             | EIV-NP-For<br>EIV-NP-Rev | GAAGGGCGGCTGATTGAGA<br>TTCGTGCAATGCCGAAAGTAC               | 58 °C                 | 63                 | 12         |
| BVDV-I &<br>BVDV-II | 5'-UTR         | 324<br>326               | ATGCCCWTAGTAGGACTAGCA<br>TCAACTCCATGTGCCATGTAC             | 55 °C                 | 288                | 13         |
| BRBV                | P3             | BRBV-Pol-F<br>BRBV-Pol-R | CTACGGTGTTCCTCGTCCAA<br>TTGCCAAGAACATTGTGAAGA              | 56°C                  | 195                | This study |
| FCV                 | RNA polymerase | FCV-RT-F<br>FCV-RT-R     | GATGTTAGGGGCATTCCAGA<br>AGTGCCGCATCAATTGACAT               | 60°C                  | 155                | This study |
| BRoV                | VP6            | BRoV-G6-<br>BRoV-G6-     | CGTAACTACGTCGAAACAGC<br>AGTTCAGTTCCTATGTATTCCG             | 60 °C                 | 200                | This study |
| BuORV               | L2             | Pyc-L2- F1<br>Pyc-L2 -R1 | TCTATCCGAAGATCCGTG<br>ACAGAAGAGTCGAGTAACAGC                | 58 °C                 | 146                | This study |

## References

1. Thonur, L.; Maley, M.; Gilray, J.; Crook, T.; Laming, E.; Turnbull, D.; Nath, M.; Willoughby, K. One-step multiplex real time RT-PCR for the detection of bovine respiratory syncytial virus, bovine herpesvirus 1 and bovine parainfluenza virus 3. *BMC Vet. Res.* **2012**, *8*, 37. <https://doi.org/10.1186/1746-6148-8-37>.
2. Ma, W.; Lager, K.M.; Richt, J.A.; Stoffregen, W.C.; Zhou, F.; Yoon, K.J. Development of real-time polymerase chain reaction assays for rapid detection and differentiation of wild-type pseudorabies and gene-deleted vaccine viruses. *J. Vet. Diagn. Invest.* **2008**, *20*, 440-447. <https://doi.org/10.1177/104063870802000405>.
3. Decaro, N.; Amorisco, F.; Desario, C.; Lorusso, E.; Camero, M.; Bellacicco, A.L.; Sciarretta, R.; Lucente, M.S.; Martella, V.; Buonavoglia, C. Development and validation of a real-time PCR assay for specific and sensitive detection of canid herpesvirus 1. *J. Virol. Methods* **2010**, *169*, 176-180. <https://doi.org/10.1016/j.jviromet.2010.07.021>.
4. Kirisawa, R.; Endo, A.; Iwai, H.; Kawakami, Y. Detection and identification of equine herpesvirus-1 and -4 by polymerase chain reaction. *Vet. Microbiol.* **1993**, *36*, 57-67. [https://doi.org/10.1016/0378-1135\(93\)90128-t](https://doi.org/10.1016/0378-1135(93)90128-t).
5. Streck, A.F.; Rüster, D.; Truyen, U.; Homeier, T. An updated TaqMan real-time PCR for canine and feline parvoviruses. *J. Virol. Methods* **2013**, *193*, 6-8. <https://doi.org/10.1016/j.jviromet.2013.04.025>.
6. Horwood, P.F.; Mahony, T.J. Multiplex real-time RT-PCR detection of three viruses associated with the bovine respiratory disease complex. *J. Virol. Methods* **2011**, *171*, 360-363. <https://doi.org/10.1016/j.jviromet.2010.11.020>.
7. Coleman, J.W.; Wright, K.J.; Wallace, O.L.; Sharma, P.; Arendt, H.; Martinez, J.; DeStefano, J.; Zamb, T.P.; Zhang, X.; Parks, C.L. Development of a duplex real-time RT-qPCR assay to monitor genome replication, gene expression and gene insert stability during in vivo replication of a prototype live attenuated canine distemper virus vector encoding SIV gag. *J. Virol. Methods* **2015**, *213*, 26-37. <https://doi.org/10.1016/j.jviromet.2014.11.015>.
8. Qiu, X.; Yu, Y.; Yu, S.; Zhan, Y.; Wei, N.; Song, C.; Sun, Y.; Tan, L.; Ding, C. Development of strand-specific real-time RT-PCR to distinguish viral RNAs during Newcastle disease virus infection. *Scientific World J.* **2014**, *2014*, 934851. <https://doi.org/10.1155/2014/934851>.
9. Hole, K.; Velazquez-Salinas, L.; Clavijo, A. Improvement and optimization of a multiplex real-time reverse transcription polymerase chain reaction assay for the detection and typing of Vesicular stomatitis virus. *J. Vet. Diagn. Invest.* **2010**, *22*, 428-433. <https://doi.org/10.1177/104063871002200315>.
10. Shirato, K.; Nao, N.; Katano, H.; Takayama, I.; Saito, S.; Kato, F.; Katoh, H.; Sakata, M.; Nakatsu, Y.; Mori, Y.; Kageyama, T.; Matsuyama, S.; Takeda, M. Development of genetic diagnostic methods for detection for novel coronavirus 2019 (nCoV-2019) in Japan. *Jpn. J. Infect. Dis.* **2020**, *73*, 304-307. <https://doi.org/10.7883/yoken.JJID.2020.061>.
11. Hoffmann, B.; Harder, T.; Lange, E.; Kalthoff, D.; Reimann, I.; Grund, C.; Oehme, R.; Vahlenkamp, T.W.; Beer, M. New real-time reverse transcriptase polymerase chain reactions facilitate detection and differentiation of novel A/H1N1 influenza virus in porcine and human samples. *Berl. Munch. Tierarztl. Wochenschr.* **2010**, *123*, 286-292. <https://doi.org/10.2376/0005-9366-123-286>.
12. Lu, Z.; Dubovi, E.J.; Zyllich, N.C.; Crawford, P.C.; Sells, S.; Go, Y.Y.; Loynachan, A.T.; Timoney, P.J.; Chambers, T.M.; Balasuriya, U.B. Diagnostic application of H3N8-specific equine influenza real-time reverse transcription polymerase chain reaction assays for the detection of Canine influenza virus in clinical specimens. *J. Vet. Diagn. Invest.* **2010**, *22*, 942-945. <https://doi.org/10.1177/104063871002200614>.
13. Vilcek, S.; Herring, A.J.; Herring, J.A.; Nettleton, P.F.; Lowings, J.P.; Paton, D.J. Pestiviruses isolated from pigs, cattle and sheep can be allocated into at least three genogroups using polymerase chain reaction and restriction endonuclease analysis. *Arch. Virol.* **1994**, *136*, 309-323. <https://doi.org/10.1007/BF01321060>.
